# Supplementary material for: Secondary inner filter effect allows extremely efficient pure white light emission by spatially separated organic fluorophores
Source: Royal Society of Chemistry journal article supplement (doi:10.1039/c8cc06203j), 2018-01-01
Supplement: c8cc06203j1.pdf [file c8cc06203j1.pdf]

## Supporting Information for

# Secondary inner filter effect allows extremely efficient pure white light emission by spatially separated organic fluorophores

## Table of Contents

|                                                                                                   |    |
|---------------------------------------------------------------------------------------------------|----|
| 1. Materials and methods                                                                          | 2  |
| 2. NMR characterization                                                                           | 4  |
| 3. Absorption and Excitation spectra of PyBIM                                                     | 6  |
| 4. Titration of PyBIM with TBAF and TFA treatment                                                 | 7  |
| 5. Molar extinction coefficient of PyBIM, PyBIM <sup>+</sup> , PyBIM <sup>-</sup>                 | 9  |
| 6. Normalized Absorption and fluorescence plots of PyBIM, PyBIM <sup>+</sup> , PyBIM <sup>-</sup> | 9  |
| 7. Reversible transformation of PyBIM from neutral to charged states                              | 10 |
| 8. DFT calculations                                                                               | 11 |
| 9. Overlap integral PyBIM, PyBIM <sup>+</sup> , PyBIM <sup>-</sup> with PMI                       | 11 |
| 10. Fluorescence titration of PyBIM, PyBIM <sup>+</sup> , PyBIM <sup>-</sup> with PMI             | 13 |
| 11. UV-Vis titration of PyBIM with PMI at different concentration                                 | 14 |
| 12. TCSPC analysis on PyBIM, PyBIM <sup>+</sup> , PyBIM <sup>-</sup> with PMI                     | 16 |
| 13. <sup>1</sup> H-NMR titration of PyBIM with PMI in THF-d <sub>8</sub>                          | 16 |
| 14. Fluorescence titration of PyBIM (10 vol % MeOH in THF) with PMI                               | 18 |
| 15. UV-Vis titration with PMI                                                                     | 18 |

## Materials and methods: -

o-Phenylenediamine, 1-Pyrenecarboxaldehyde were purchased from Sigma-Aldrich Chemical Company. Perylene-3,4,9,10-tetracarboxylic dianhydride, 2,6-Diisopropylaniline were purchased from Alfa-Aesar. Zinc acetate dihydrate, Imidazole, Nitrobenzene were purchased from Spectrochem. These chemicals were used as received. Spectroscopy grade solvents purchased from Spectrochem were used for spectroscopic analyses. Photophysical studies were undertaken in Q-cuvette (10 mm path length). UV-visible spectra were recorded on Agilent Technologies Cary 3100 UV-Vis-NIR Spectrophotometer. UV-Visible titration analysis of PyBIM (0.1 mM) against TFA, TBAF or PMI were carried out in THF at 298 K. Fluorescence spectra were recorded on Jobin Yvon Horiba's Fluorolog-3-21. All the Nuclear Magnetic Resonance (NMR) spectra were recorded at 298 K in DMSO-d<sub>6</sub> solvent on Bruker Ultra Shield (500 MHz) spectrometer using tetramethylsilane (TMS) as internal standard. Mass spectra were recorded on Micro TOF-Q-II instrument from Bruker Daltonics by using electrospray ionization (ESI) mode. Life time measurements were done on time-correlated single photon counting (TCSPC) spectrometer (Delta Flex-01-DD/ Horiba).

## Fluorescence Studies: -

Fluorescence analyses were carried out in THF, and stock solutions of compound (PyBIM = 0.1 mM) were prepared in THF at 298 K, further diluted solutions were used to record the spectra. All the fluorescence spectra were recorded on  $\lambda_{\text{ex}} = 365$  nm. In solution state the relative fluorescence quantum yield was calculated at low concentration (1  $\mu\text{M}$  in THF) for PyBIM, PyBIM<sup>+</sup>, PyBIM<sup>-</sup> using Quinine Sulphate hemisulphate monohydrate ( $\Phi_f = 0.57$  in 0.1 N HClO<sub>4</sub>) as standard. Similarly, Rhodamine 6G ( $\Phi_f = 0.95$  in ethanol) was used for calculating quantum yield for PMI. All the white light quantum yield was calculated using Quinine Sulphate hemisulphate monohydrate as standard at their respective concentration at  $\lambda_{\text{ex}} = 355$  nm. The following equation was used to calculate quantum yield. [1]

$$\Phi_{F,x} = \Phi_{F,s} (F_x/F_s) (f_s/f_x) (\eta_x/\eta_s)^2$$

Where-

$\Phi_{F,x}$  = quantum yield of sample,  $\Phi_{F,s}$  = quantum yield of standard,  $F_x$  and  $F_s$  indicate fluorescence integral of sample and standard,  $\eta_x$  and  $\eta_s$  represent the refractive indices of solvent used to measure the fluorescence spectra of the sample and the standard, respectively,  $f$  represents the absorption factor at the excitation wavelength ( $f = 1 - 10^{-A(\lambda_{\text{ex}})}$ ) where  $A(\lambda_{\text{ex}})$  is the absorbance at the excitation wavelength.

## Time-resolved fluorescence measurements: -

Time-resolved fluorescence was performed on time-correlated single photon counting (TCSPC) spectrometer. Photomultiplier tube of picosecond photon detection module was used as detector. Delta diode laser (373 nm) was used for excitation. All decay curves were analysed using non-

linear least-squares iteration method (IBH DAS6, 6.8 version). The quality of fitting was determined by the fitting factor ( $\chi^2$ ).

### DFT Calculations: -

The molecular structure optimization of the compounds was performed using DFT at B3LYP level combined with 6-31G(d) basis sets using Gaussian 09 program. [2]

### Synthesis and characterization of Pyrene-Benzimidazole PyBIM: -

#### Synthesis of PyBIM

2-(pyren-1-yl)-1*H*-benzo[d]imidazole (PyBIM, Pyrene-Benzimidazole conjugate) was synthesized via a reported procedure. [3] The purity of PyBIM was verified by HRMS, <sup>1</sup>H-NMR studies.

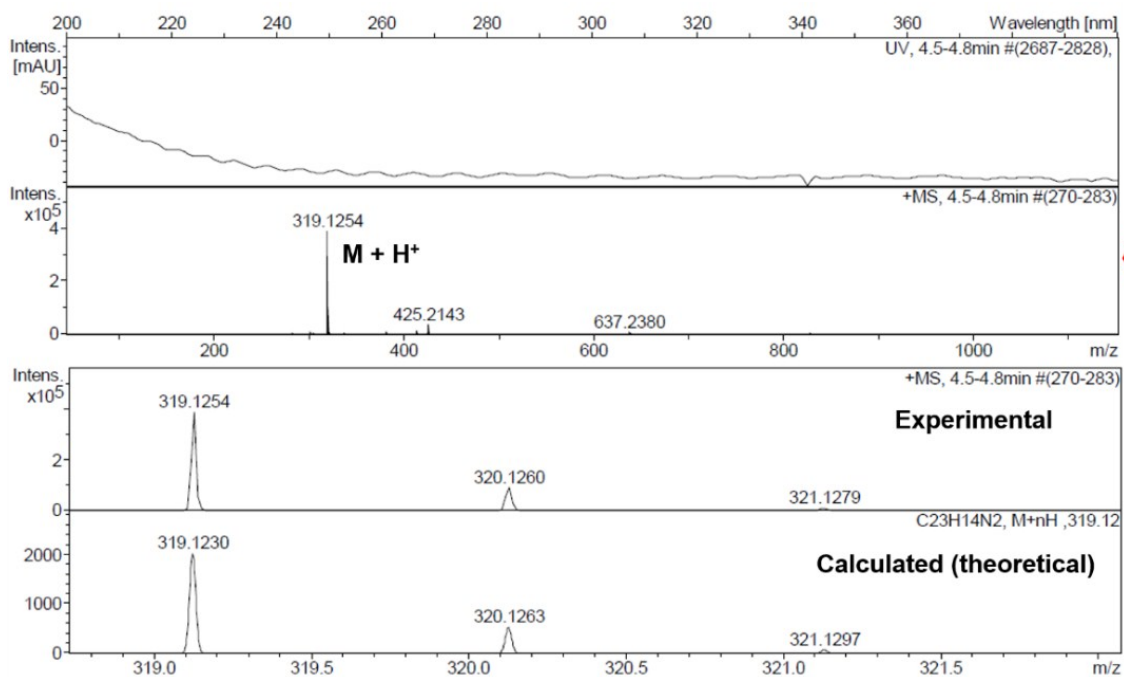

**Figure S1.** ESI-HRMS spectrum of PyBIM.

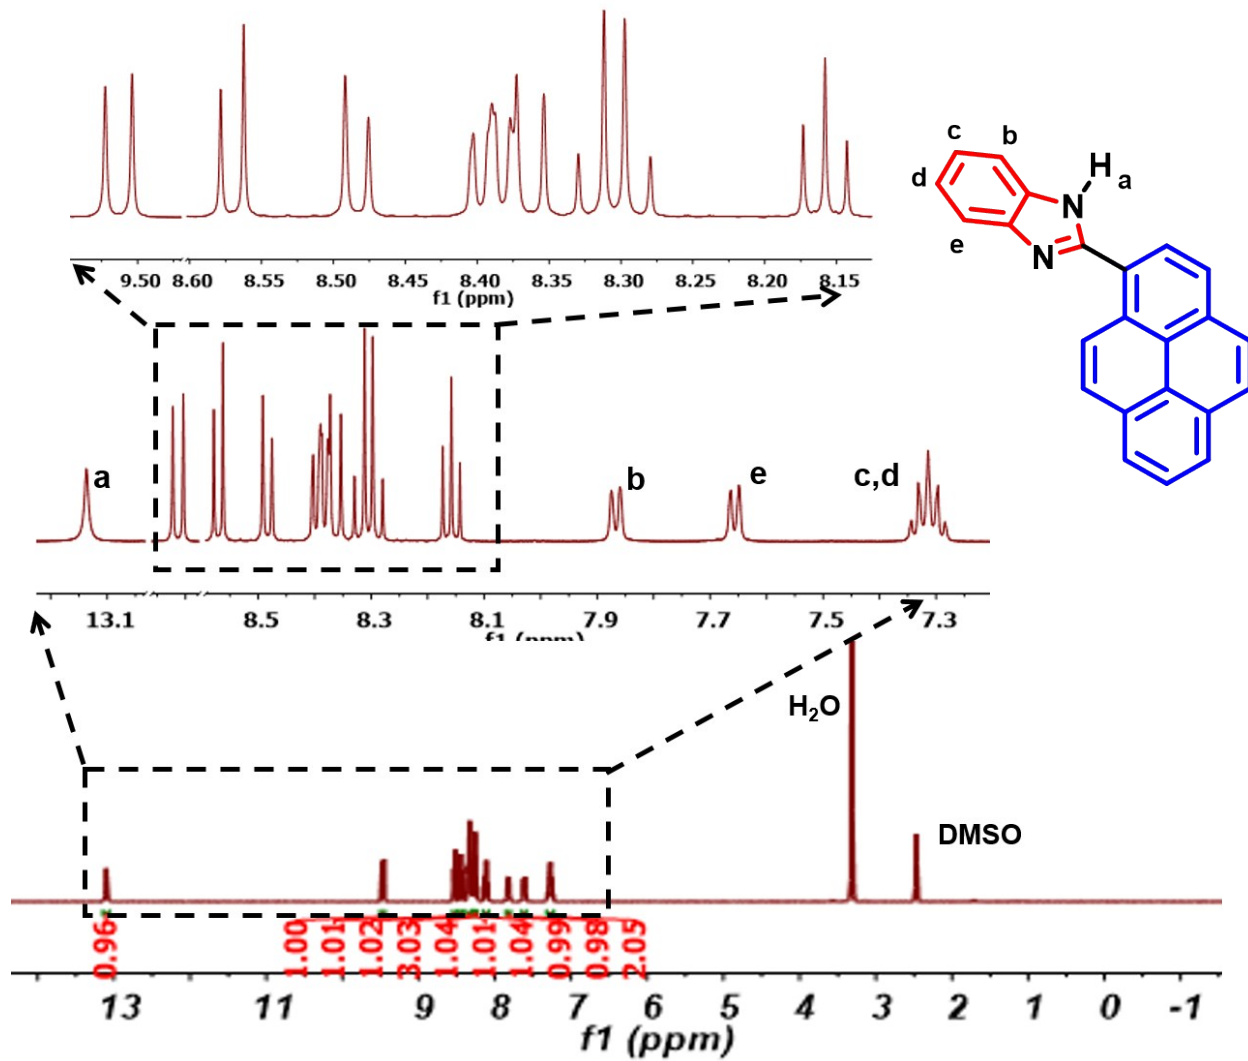

**Figure S2.**  $^1\text{H-NMR}$  spectrum of PyBIM in  $\text{DMSO-d}_6$  (500 MHz) at 298 K. The region expanded above is highlighted by dashed boxes.

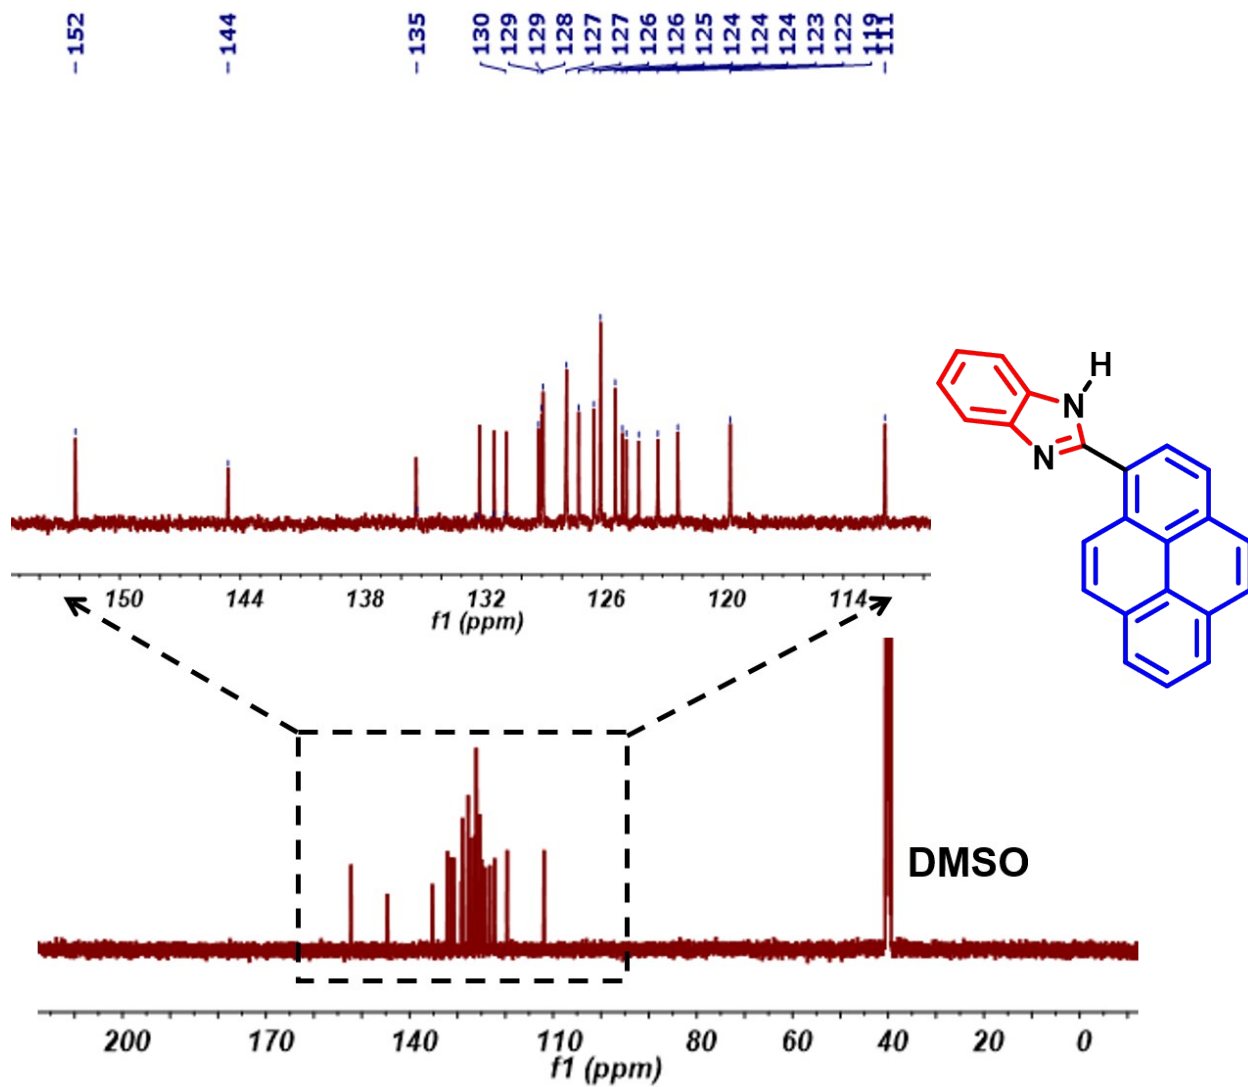

**Figure S3.**  $^{13}\text{C}$  NMR spectrum of PyBIM in  $\text{DMSO-d}_6$  (125 MHz) at 298 K. The region expanded above is highlighted by dashed boxes.

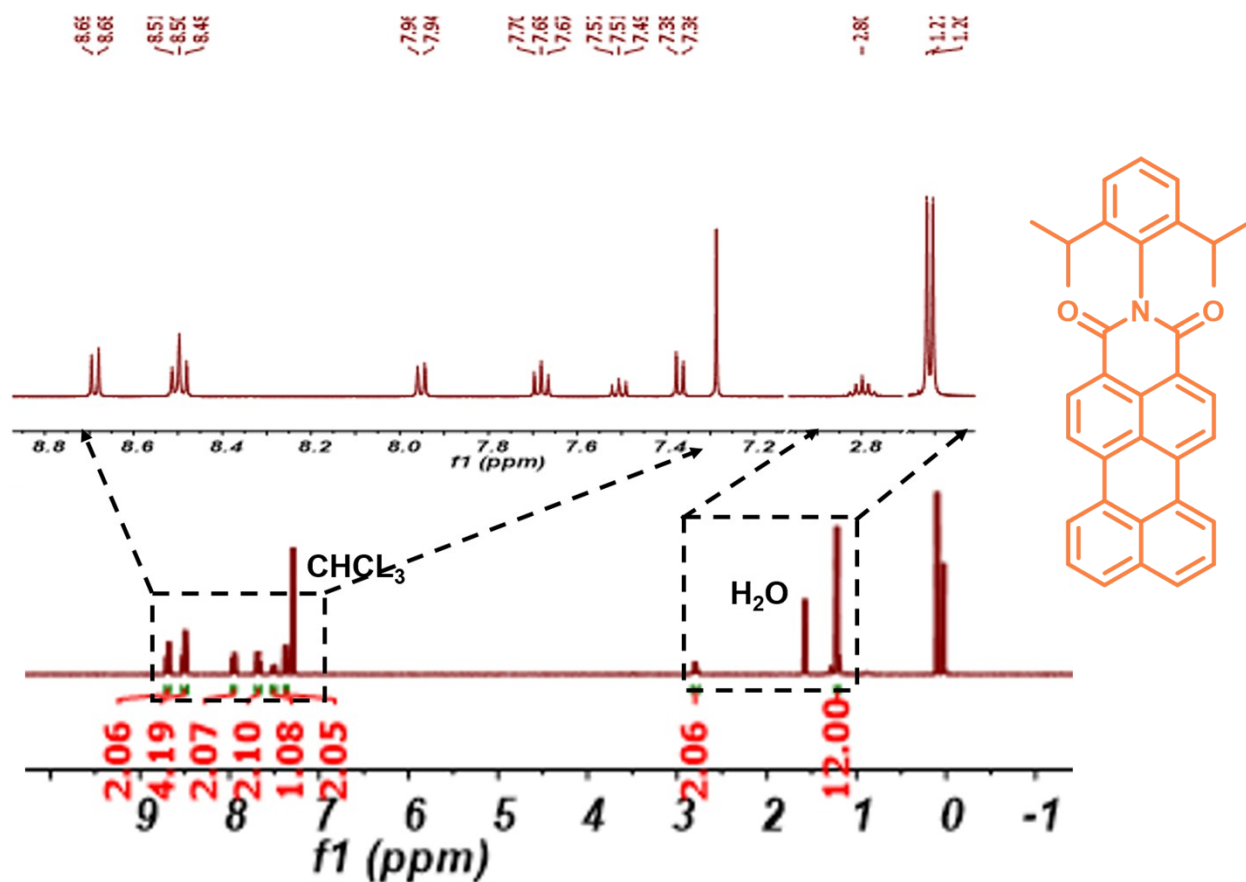

**Figure S4.** <sup>1</sup>H-NMR spectrum of PMI in CDCl<sub>3</sub> (500 MHz) at 298 K. The region expanded above is highlighted by dashed boxes.

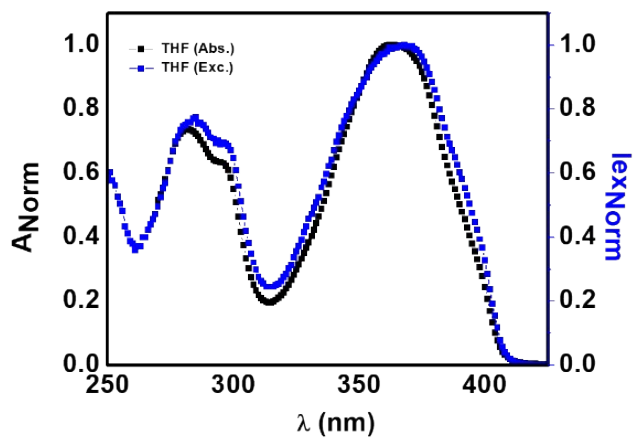

**Figure S5.** Normalized absorption and excitation spectra of PyBIM (10 μM) in THF monitored at  $\lambda_{em} = 405$  nm.

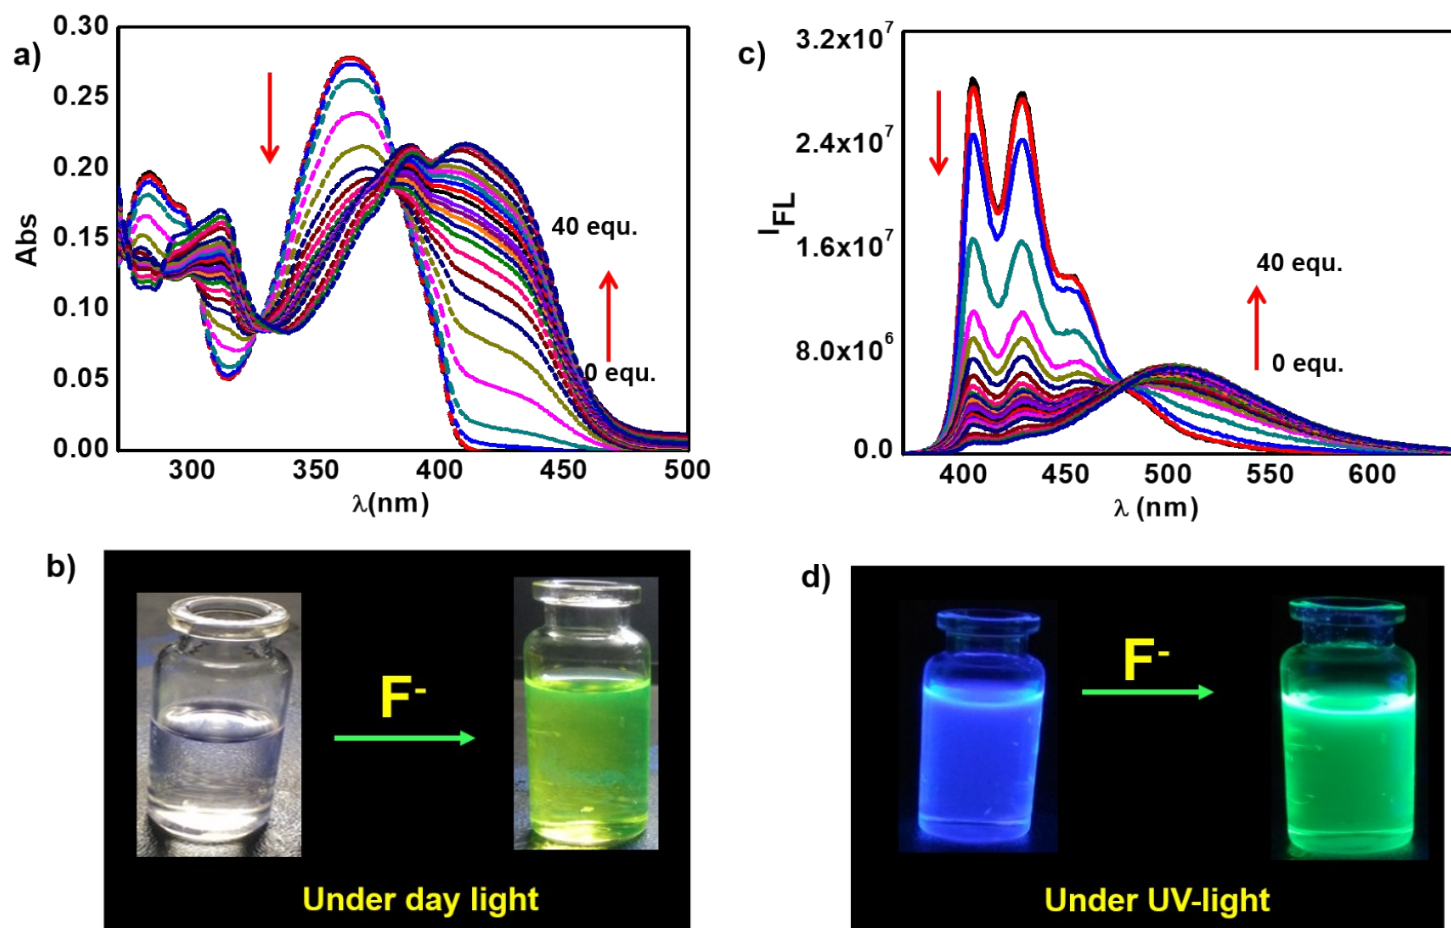

**Figure S6.** (a) UV-Vis titration of PyBIM (10  $\mu$ M in THF) with TBAF (0-40 eqv.). (b) Digital photographs of vials containing PyBIM in THF under daylight illumination before (left) and after (right) addition of TBAF. (c) Fluorescence titration of PyBIM with TBAF (0-40 eqv.) at  $\lambda_{ex}$  =365 nm (d) Photo of vials containing PyBIM in THF under UV-lamp (365 nm) illumination before and after addition of TBAF.

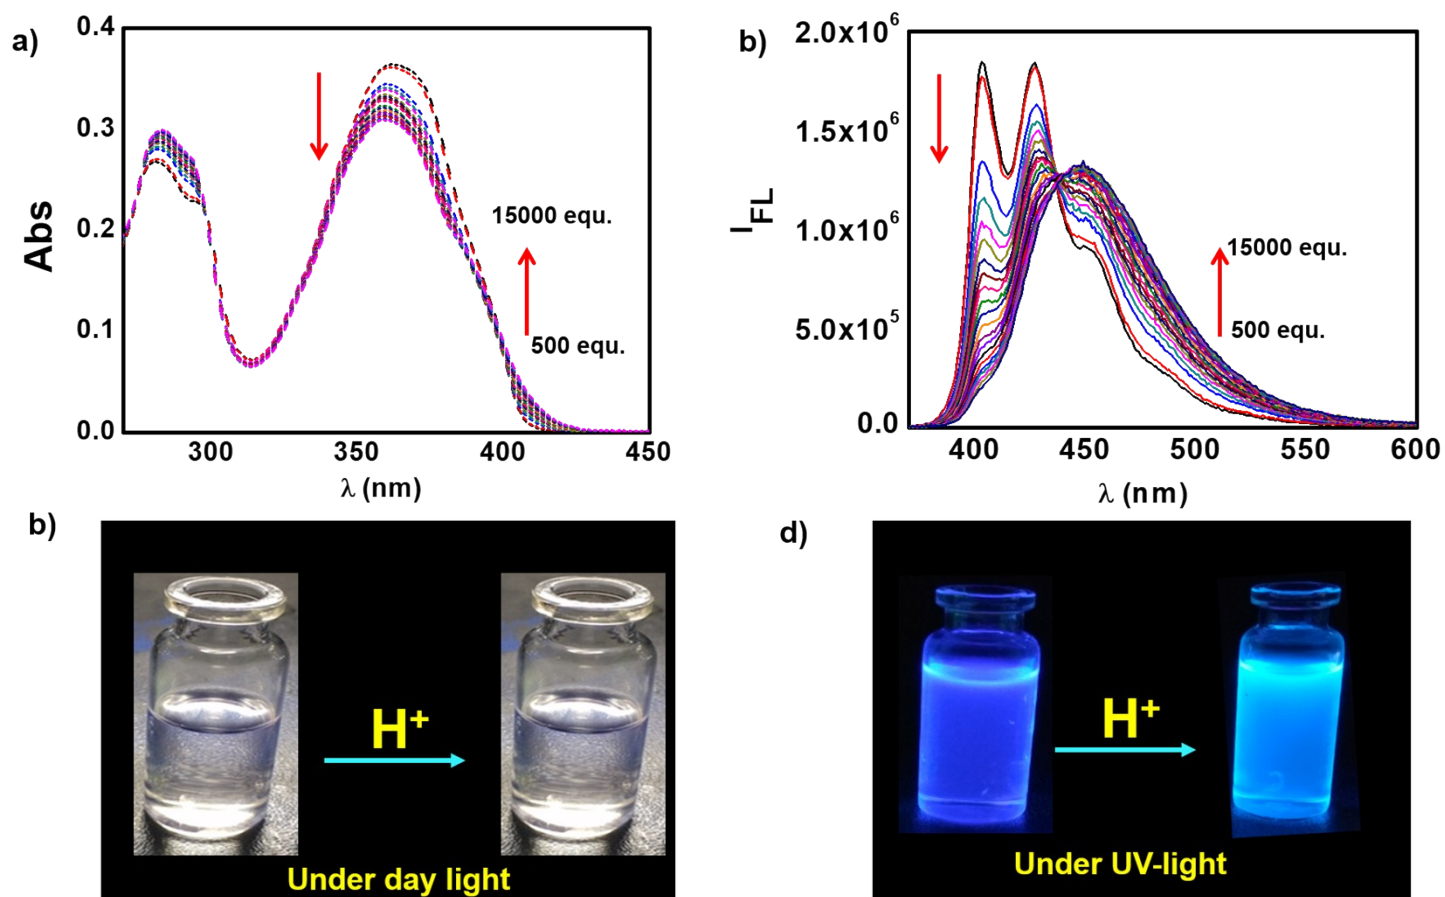

**Figure S7.** (a) UV-Vis titration of PyBIM (10  $\mu$ M in THF) with TFA (500-15000 equ.). (b) Digital photographs of vials containing PyBIM in THF under daylight illumination before (left) and after (right) addition of TFA. (c) Fluorescence titration of PyBIM with TFA (500-15000 equ.) at  $\lambda_{ex}$  = 365 nm. (d) Photos of vials containing PyBIM in THF under illumination by UV-lamp (365 nm) before and after addition of TFA.



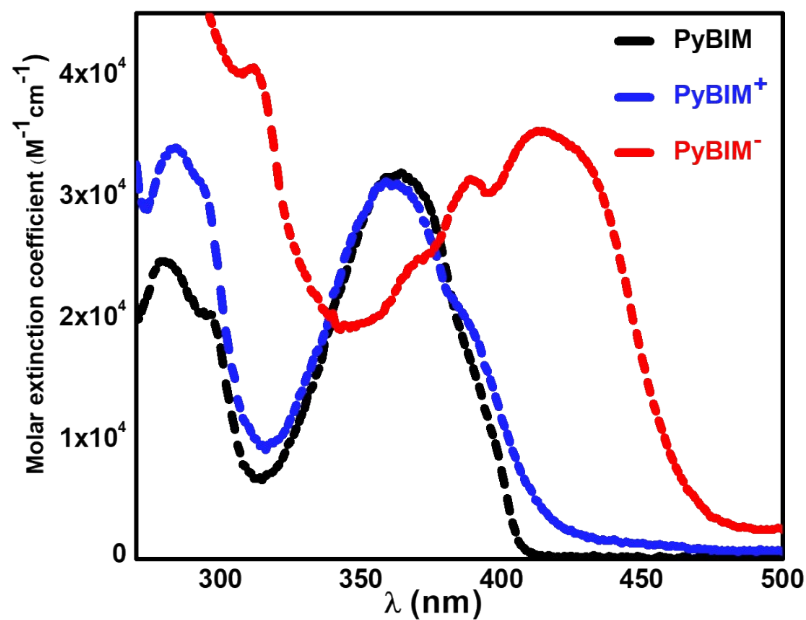

**Figure S8.** Plots of molar extinction coefficients ( $\epsilon$ ) against wavelength for PyBIM, PyBIM<sup>+</sup>, PyBIM<sup>-</sup>.

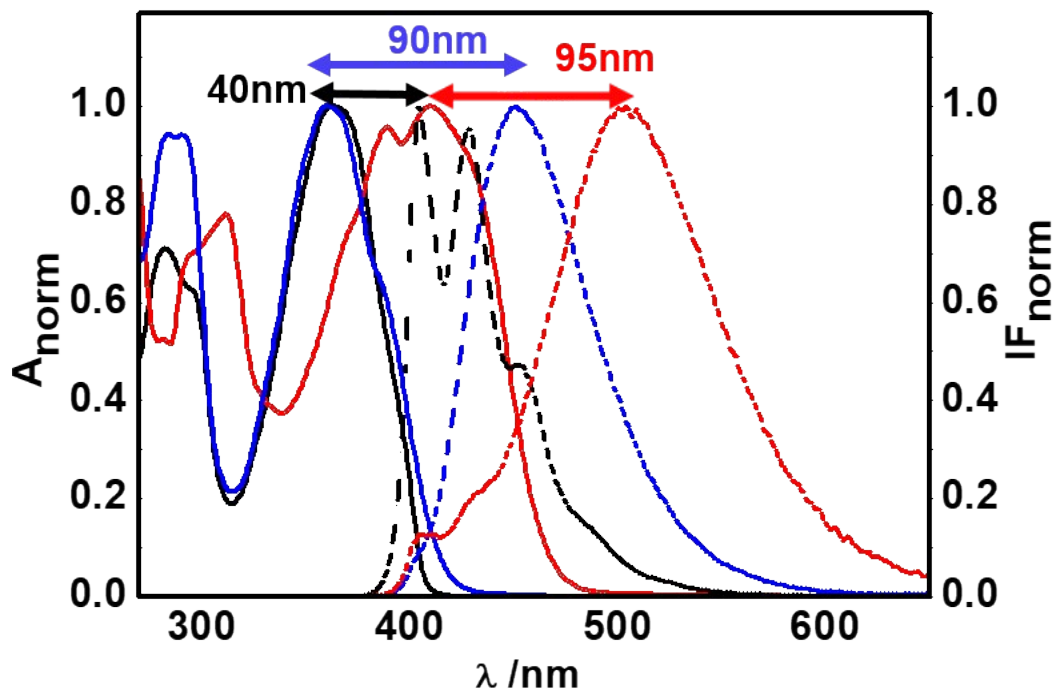

**Figure S9.** Normalized Absorption (solid lines) and fluorescence (dashed lines) profiles of PyBIM, PyBIM<sup>+</sup>, PyBIM<sup>-</sup> (10  $\mu$ M in THF). The Stokes shift values for the three are mentioned on top of the graphs.

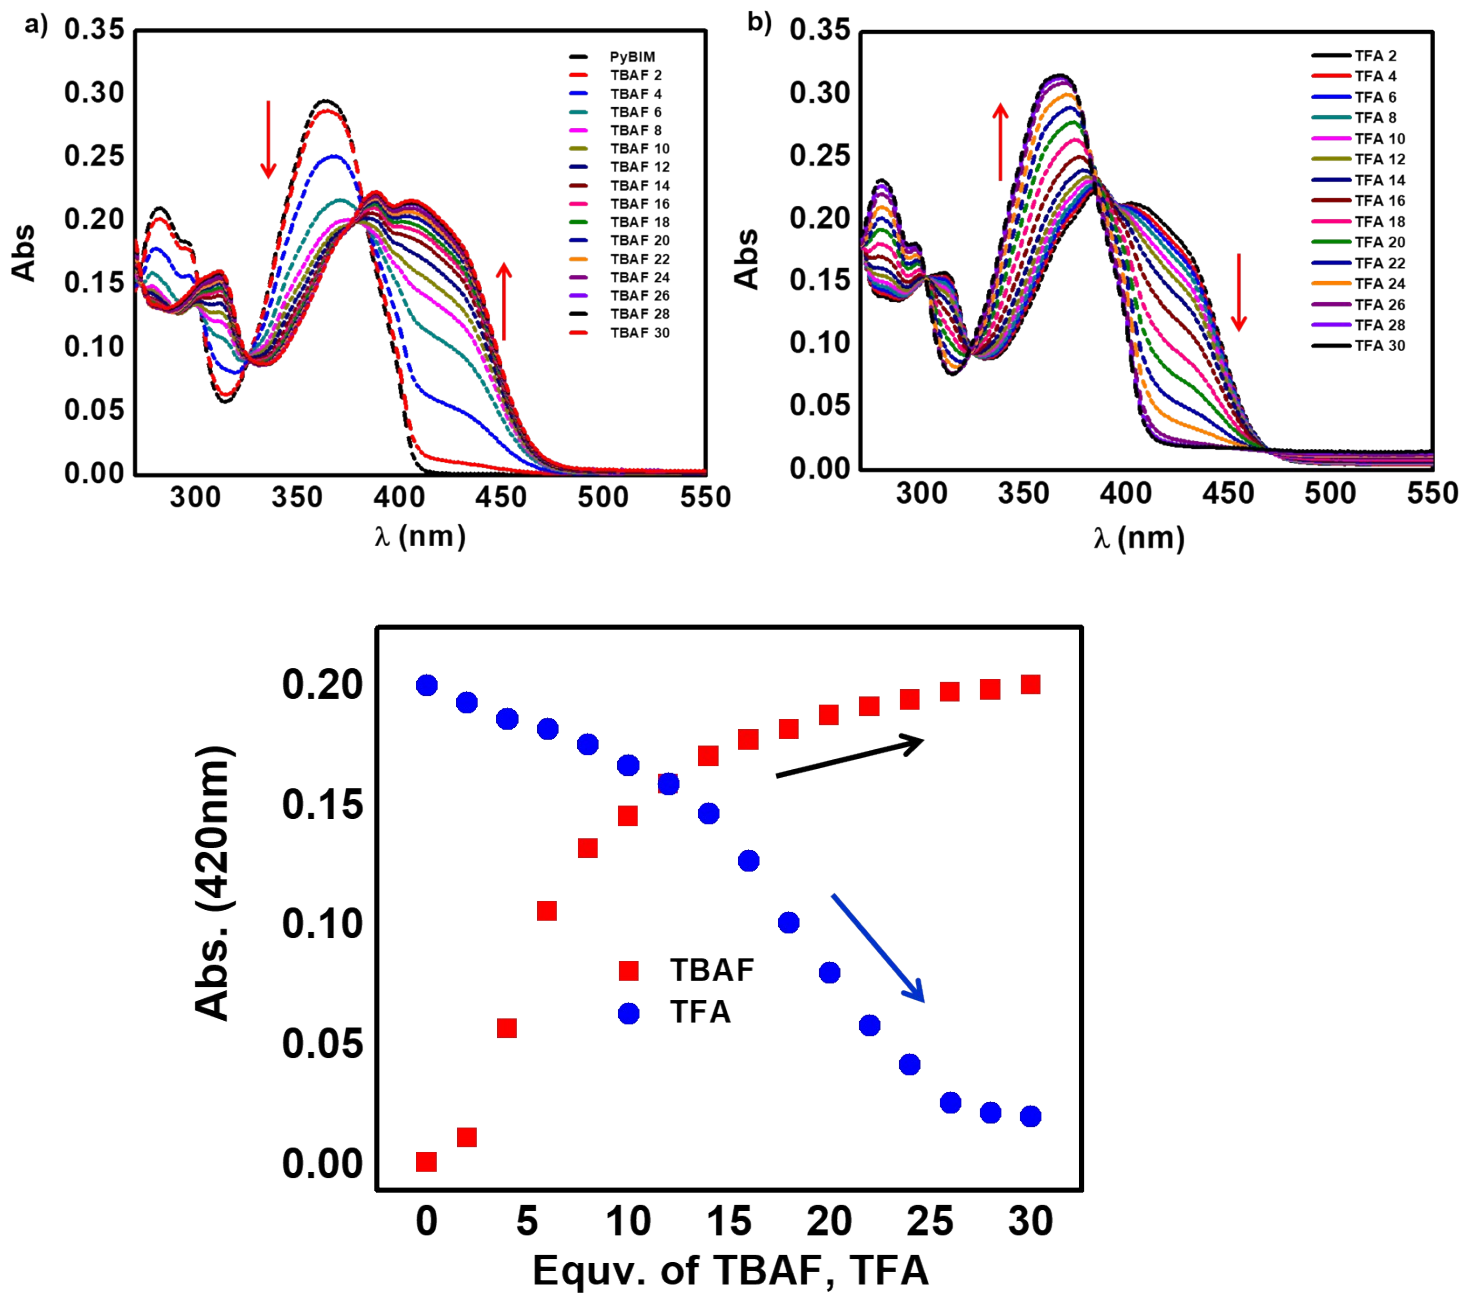

**Figure S10.** (a) UV-Vis titration of PyBIM with TBAF (0 to 30 eqv.). (b) UV-vis changes on subsequent addition of TFA (0-30 eqv.) to the same cuvette. (c) Plot of absorbance at 420 nm against TBAF and TFA treatment.

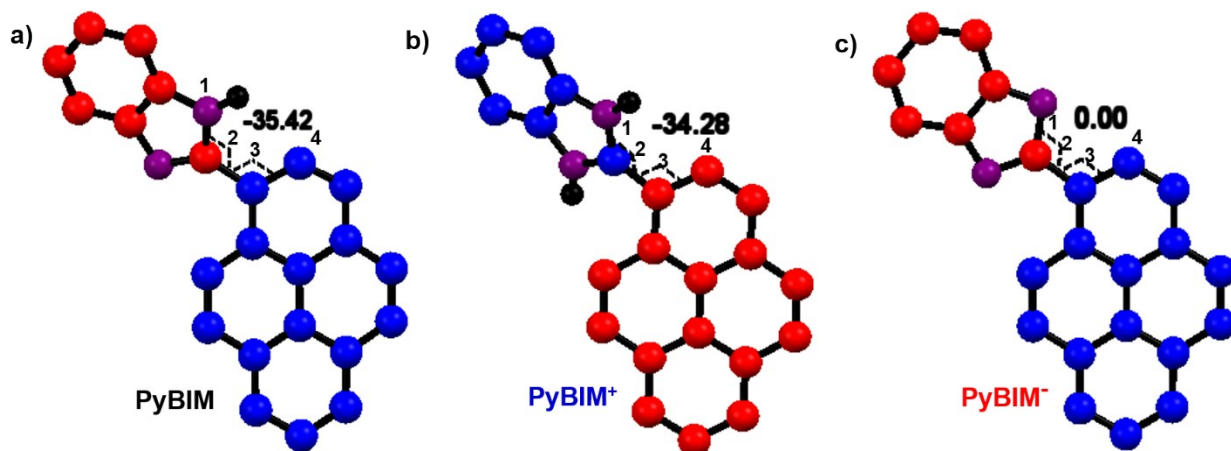

**Figure S11.** Torsional angle for (a) PyBIM, (b) PyBIM<sup>+</sup>, (c) PyBIM<sup>-</sup> in between atoms (1, 2, 3, 4) highlighted above calculated by using the method of {B3LYP/6-31G(d)}.

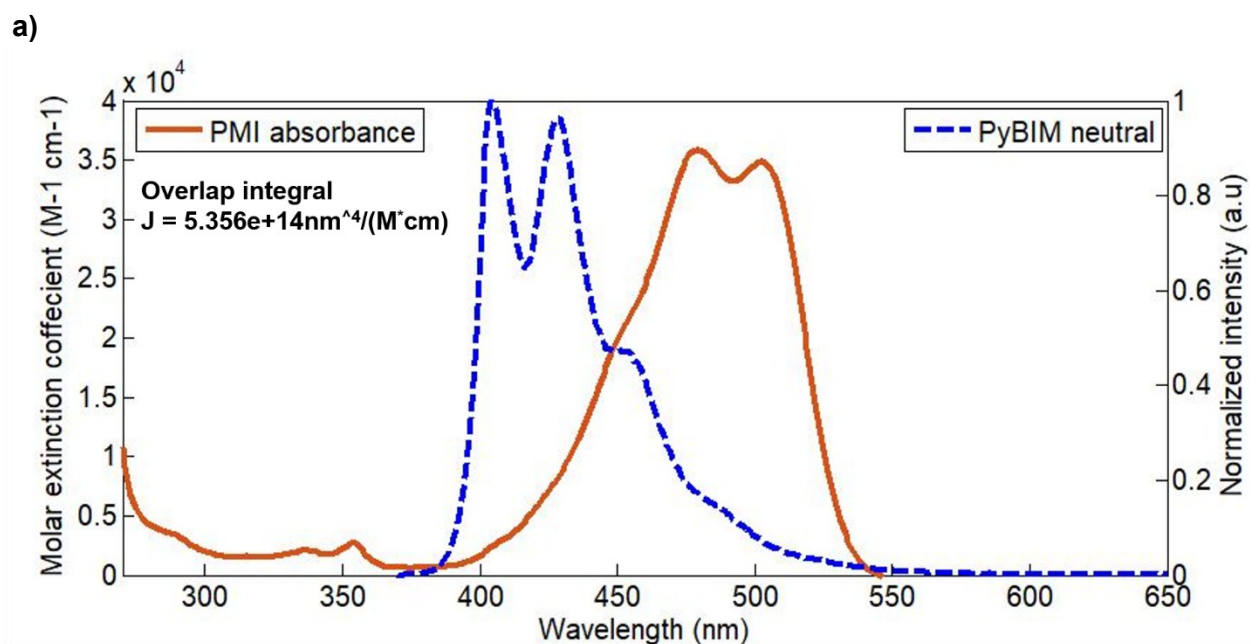

OBS: Make sure your absorption spectra are in molar absorptivities (units 1/(M cm)).

Overlap integral between 'PMI absorbance' and 'PyBIM neutral':  
 $J = 5.356e+14 \text{ nm}^4 / (\text{M}^* \text{cm})$

b)

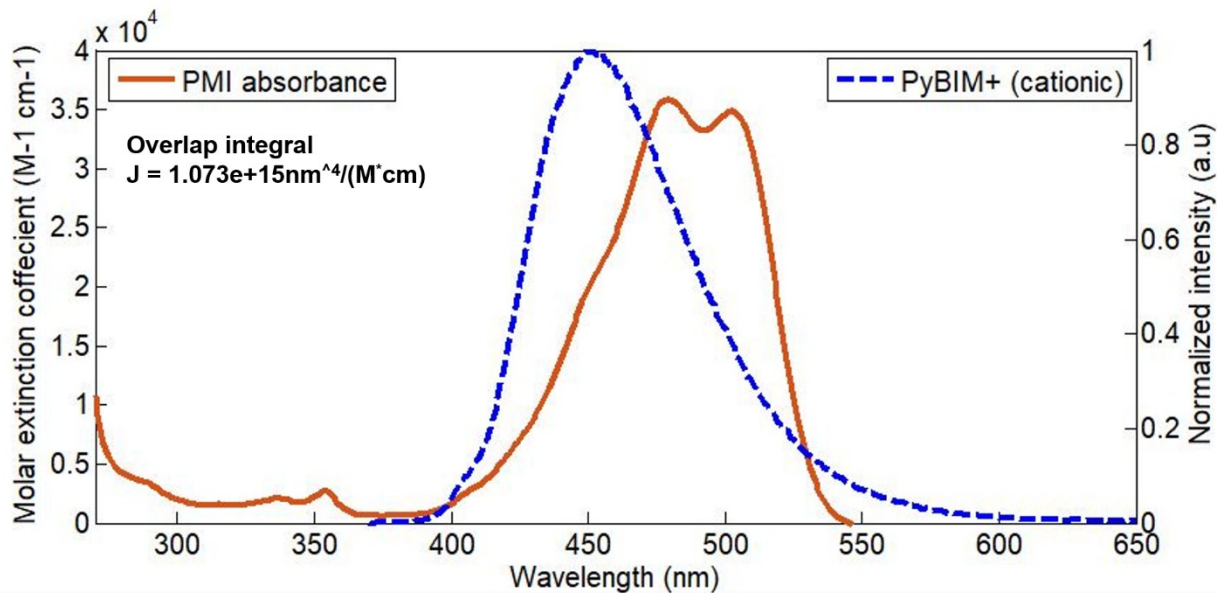

OBS: Make sure your absorption spectra are in molar absorptivities (units 1/(M cm)).

Overlap integral between 'PMI absorbance' and 'PyBIM+ (cationic)':  
 $J = 1.073e+15 \text{ nm}^4/(\text{M}\cdot\text{cm})$

c)

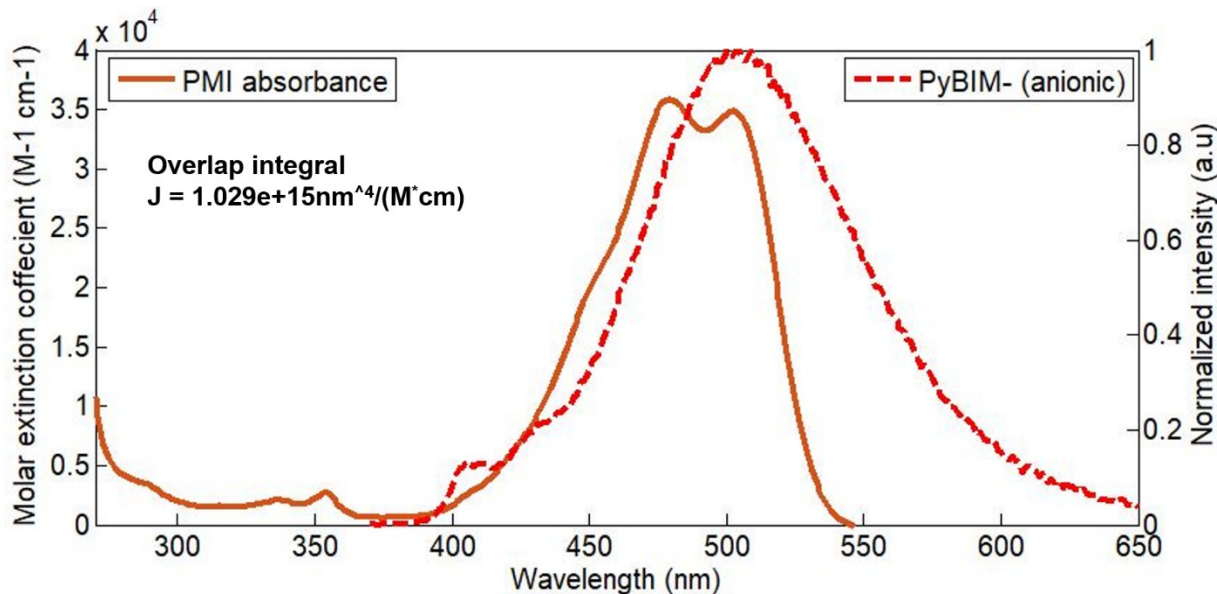

OBS: Make sure your absorption spectra are in molar absorptivities (units 1/(M cm)).

Overlap integral between 'PMI absorbance' and 'PyBIM- (anionic)':  
 $J = 1.029e+15 \text{ nm}^4/(\text{M}\cdot\text{cm})$

**Figure S12.** The spectral overlap<sup>[1]</sup> between the absorption of (a) PyBIM, (b) PyBIM<sup>+</sup>, (c) PyBIM<sup>-</sup> (each 10 μM in THF) with emission of PMI in THF.

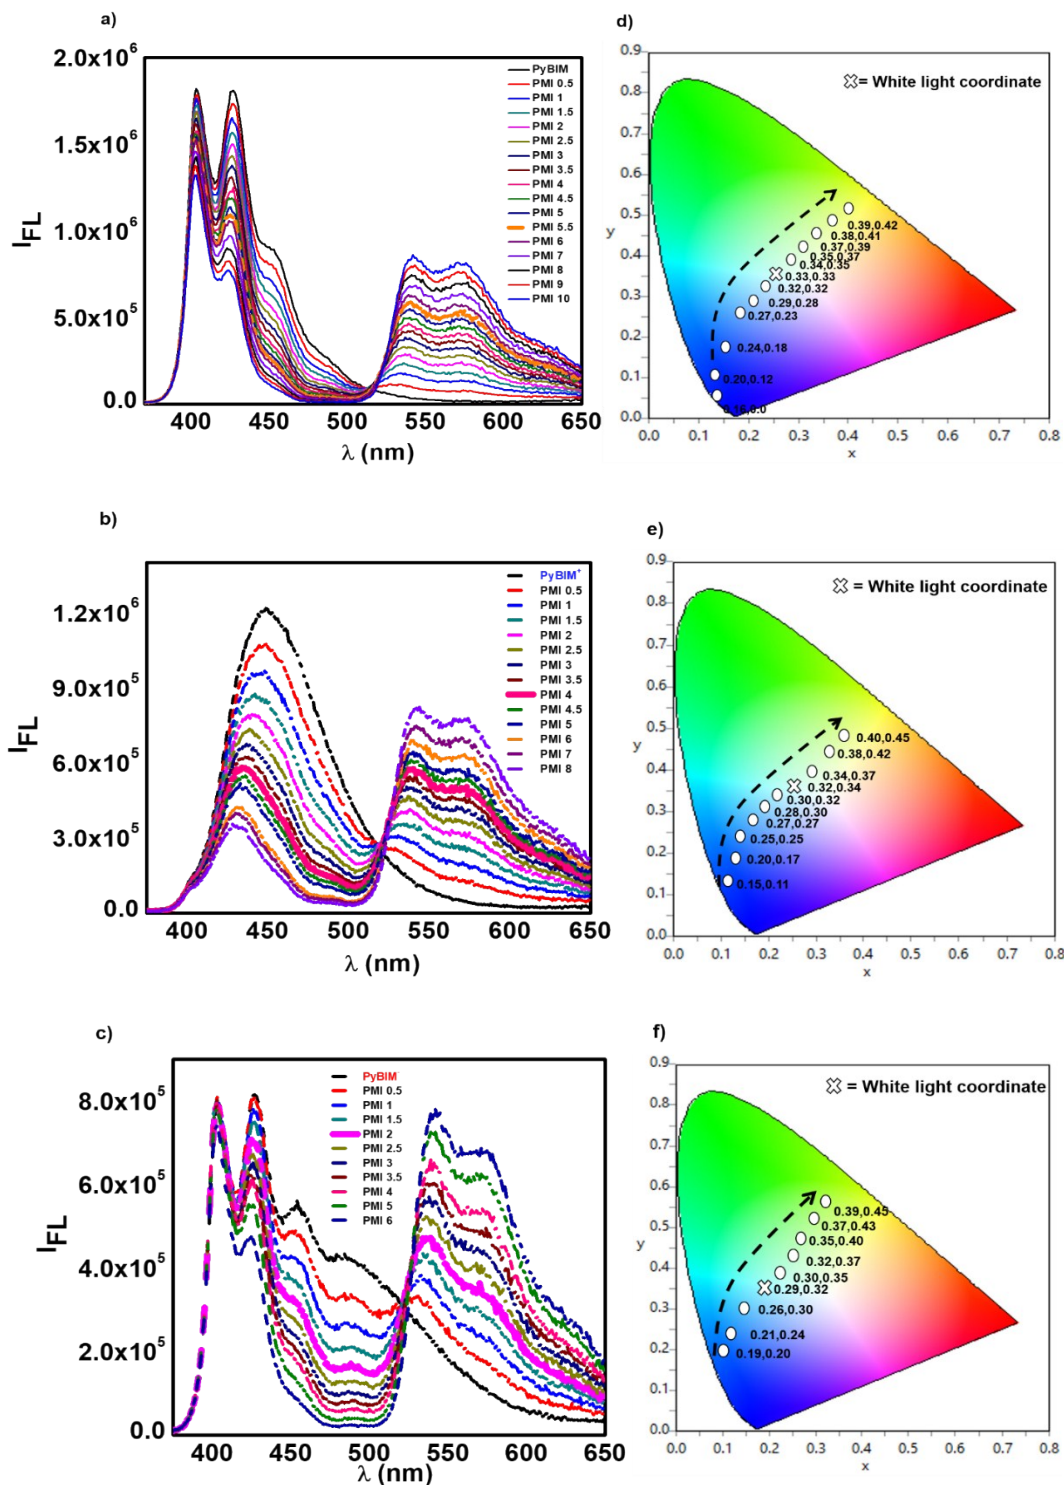

**Figure S13.** Fluorescence titration of (a) PyBIM, (b) PyBIM<sup>+</sup>, (c) PyBIM<sup>-</sup> (each 10  $\mu$ M in THF) with PMI in THF at  $\lambda_{ex}$  = 355 nm. The white light spectra are shown in bold. Corresponding CIE coordinates are shown by open circle while white light emission (WLE) coordinate shown by cross sign in (d), (e), (f).

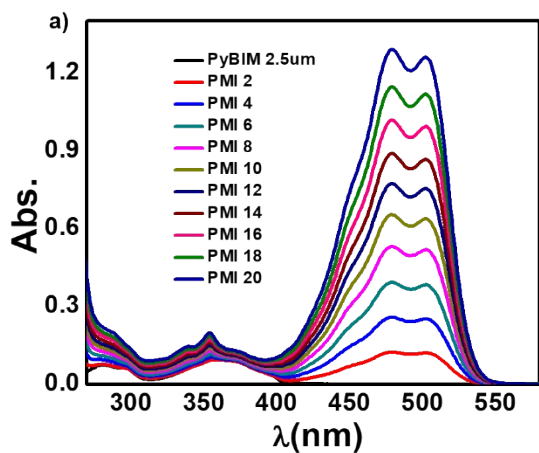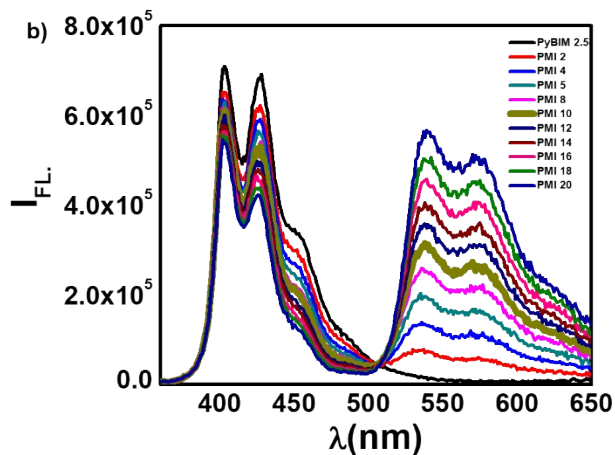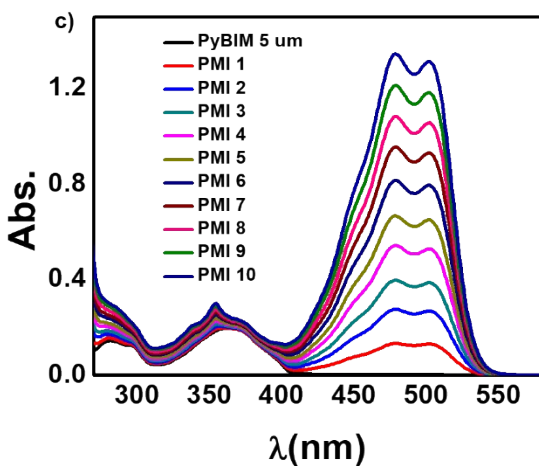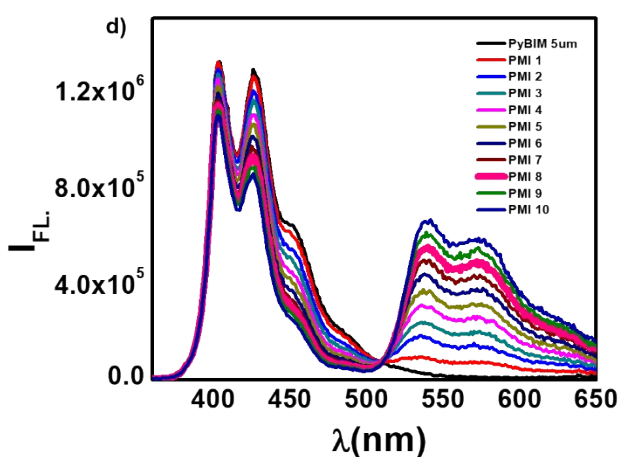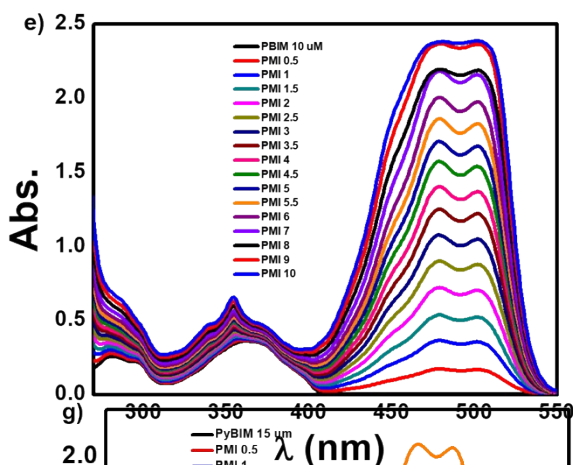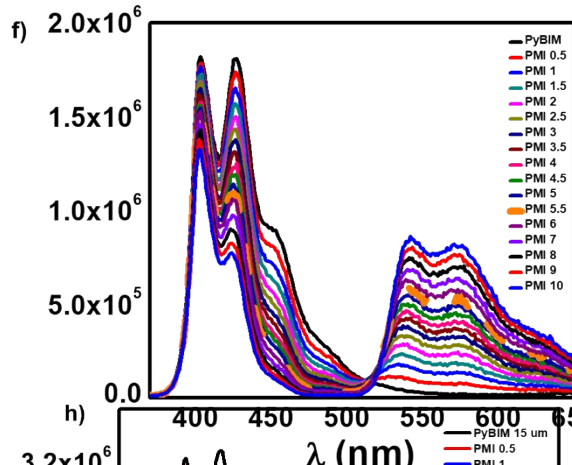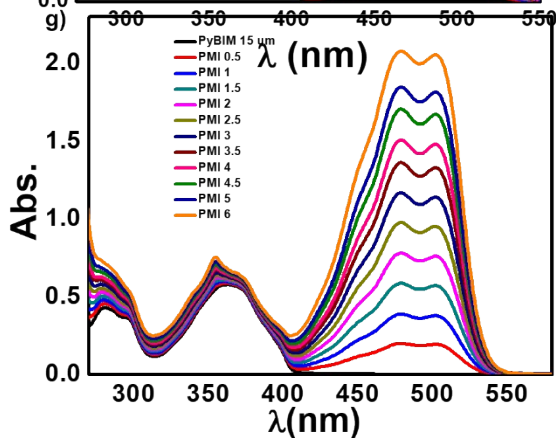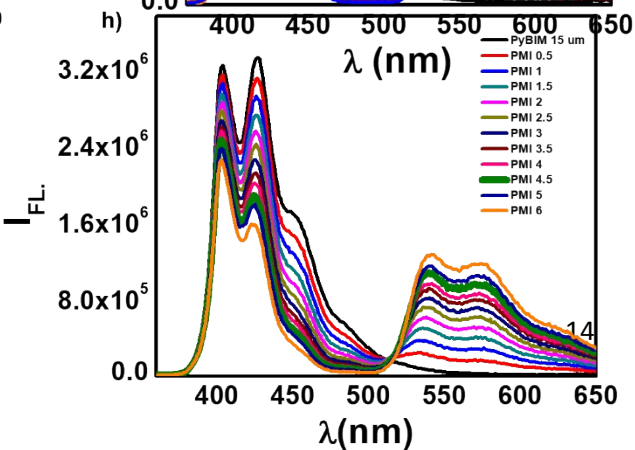

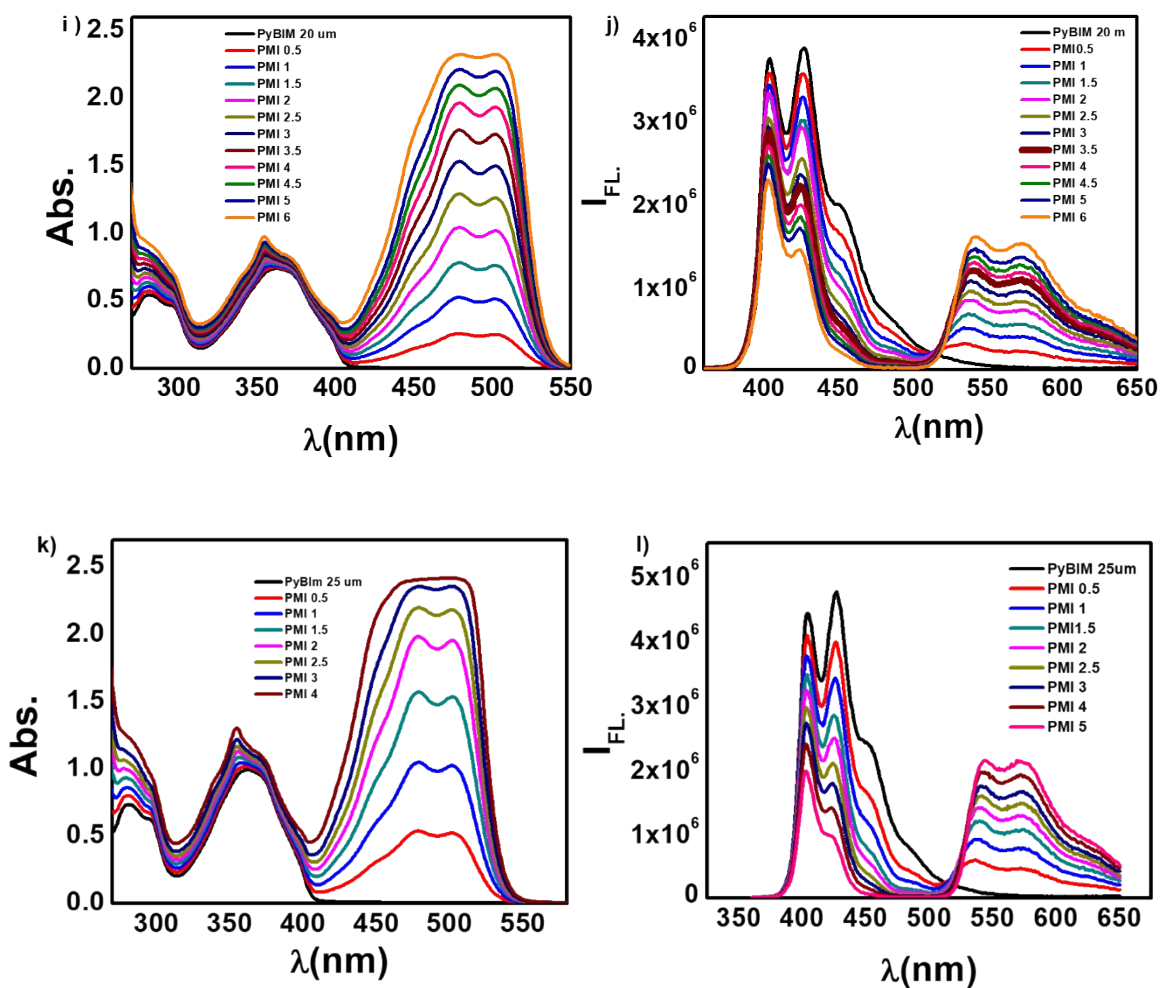

**Figure S14.** PyBIM was titrated with PMI (in THF) at 2.5  $\mu\text{M}$ , 5  $\mu\text{M}$ , 10  $\mu\text{M}$ , 15  $\mu\text{M}$ , 20  $\mu\text{M}$ , 25  $\mu\text{M}$  their respective UV-Vis is shown in (a), (c), (e), (g), (i), (k) and their corresponding fluorescence titration ( $\lambda_{\text{ex}} = 355 \text{ nm}$ ) are shown in (b), (d), (f), (h), (j), (l). All the WLE spectra are shown bold.

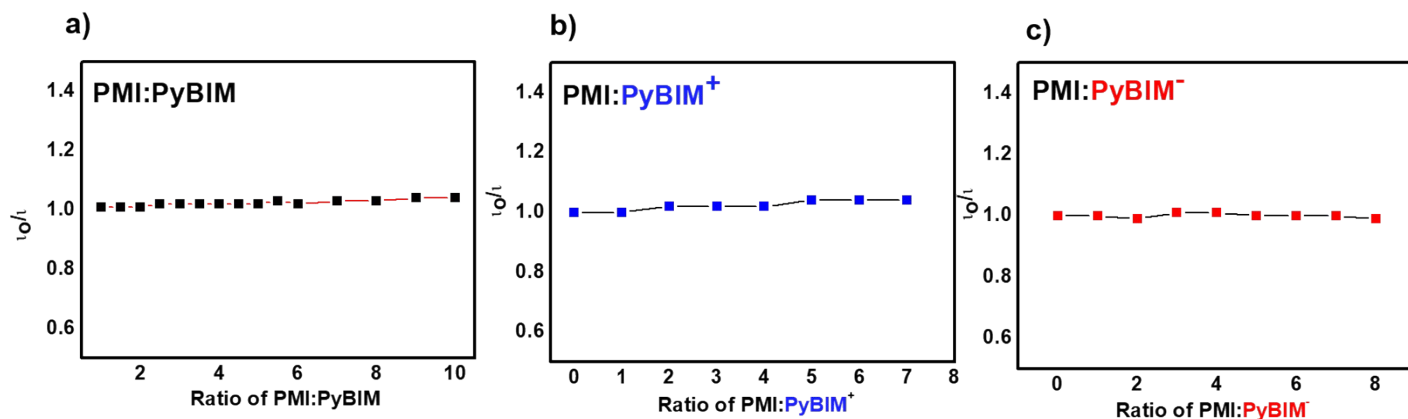

**Figure S15.** The ratio of lifetime before ( $\tau_0$ ) and on incremental addition of PMI ( $\tau$ ) for (a) PyBIM (b) PyBIM<sup>+</sup> and (c) PyBIM<sup>-</sup> on incremental with respect to ratio of PMI to PyBIM (or PyBIM<sup>+</sup> or PyBIM<sup>-</sup>).

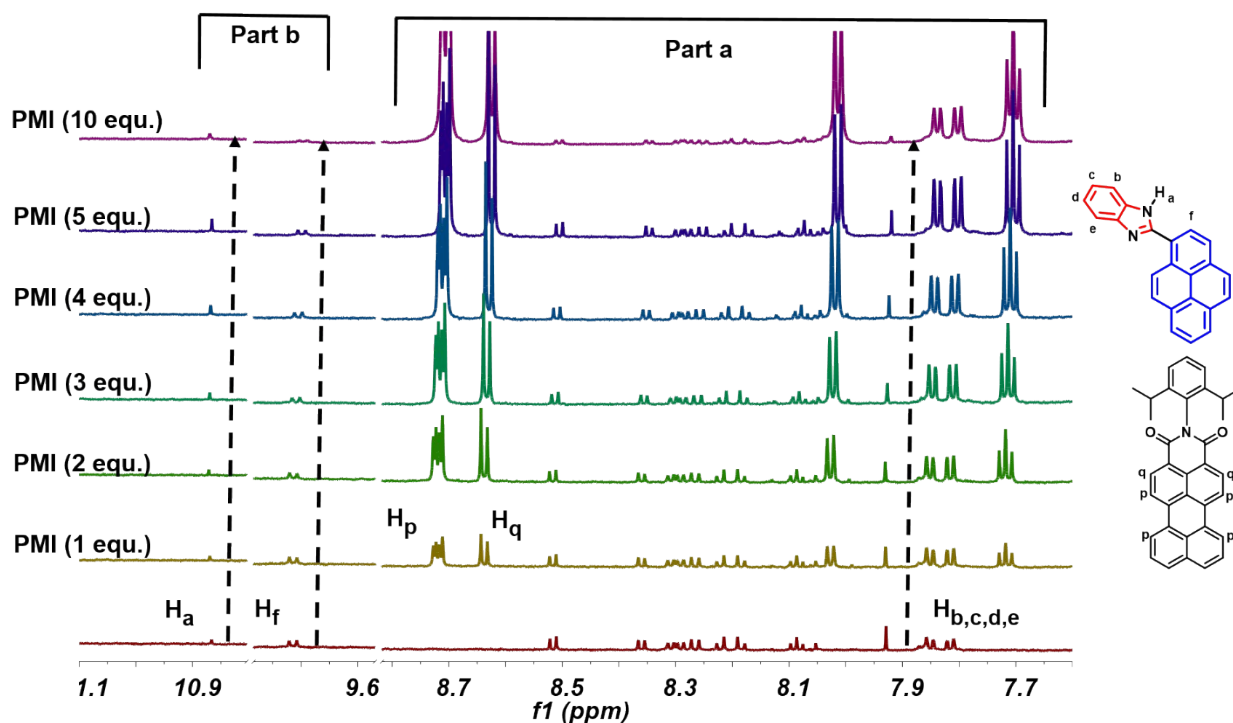



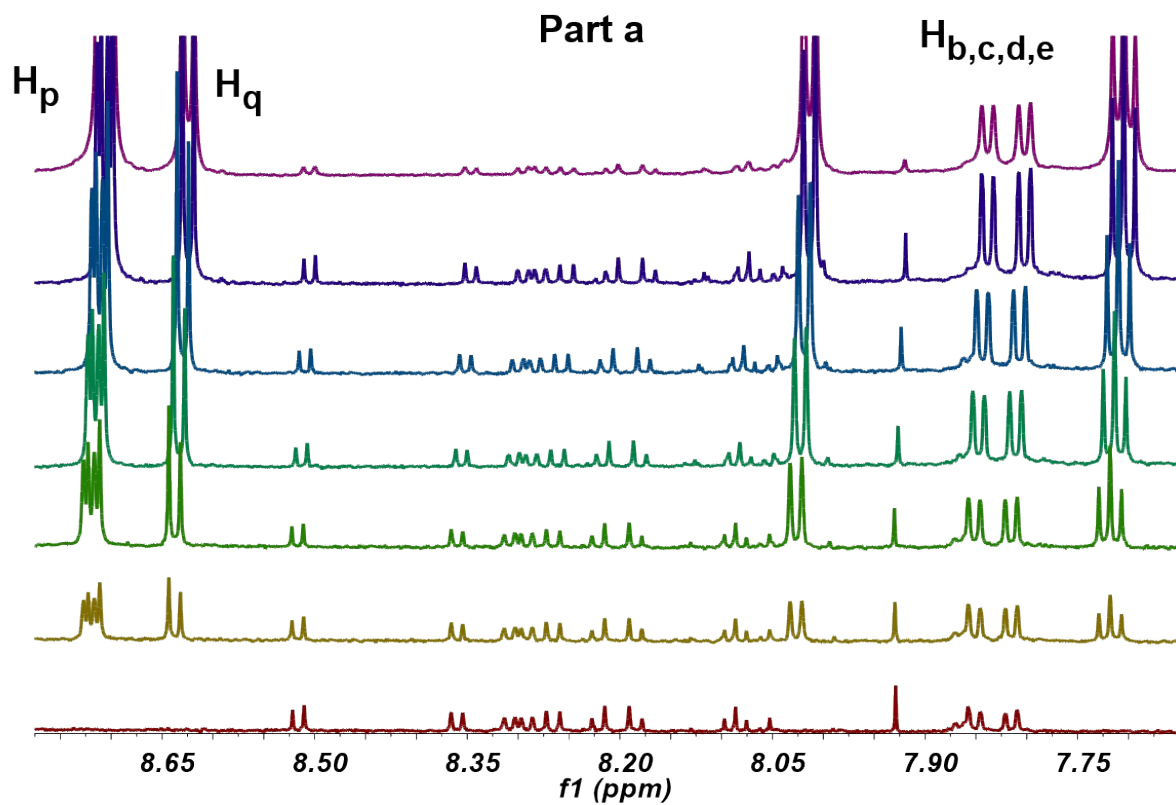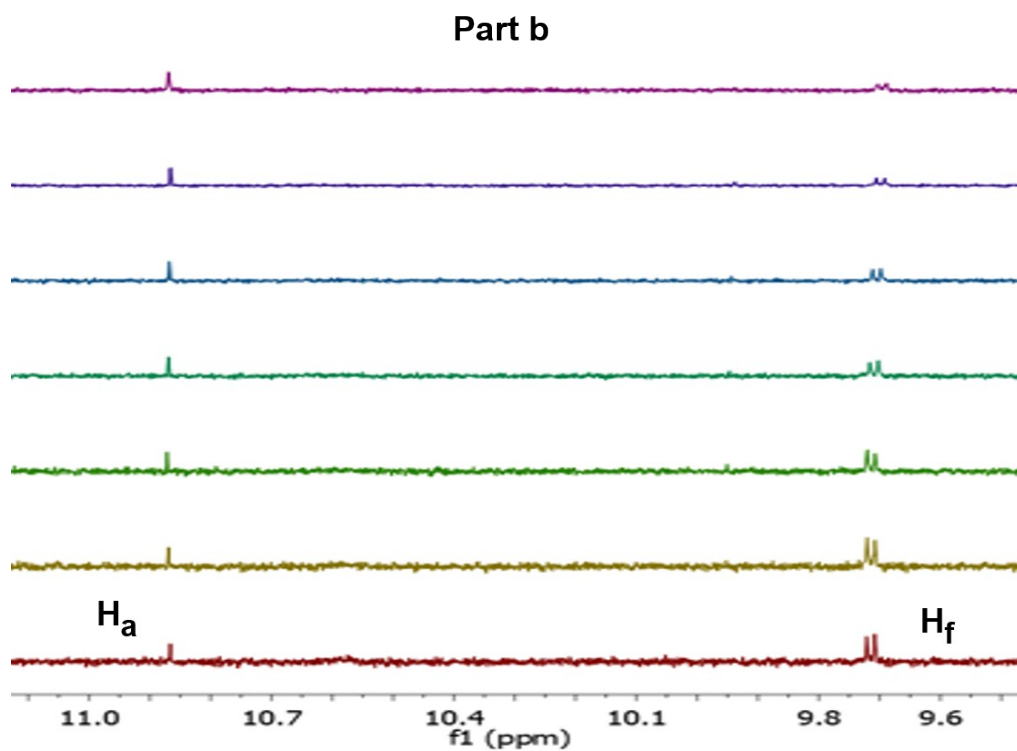

**Figure S16.**  $^1\text{H-NMR}$  titration of PyBIM ( $20\ \mu\text{M}$ ) with PMI ( $20\ \mu\text{M}$ - $200\ \mu\text{M}$ ) in  $\text{THF-d}_8$  at (700 MHz) at 298 K. The region (a) and (b) expanded and shown below.

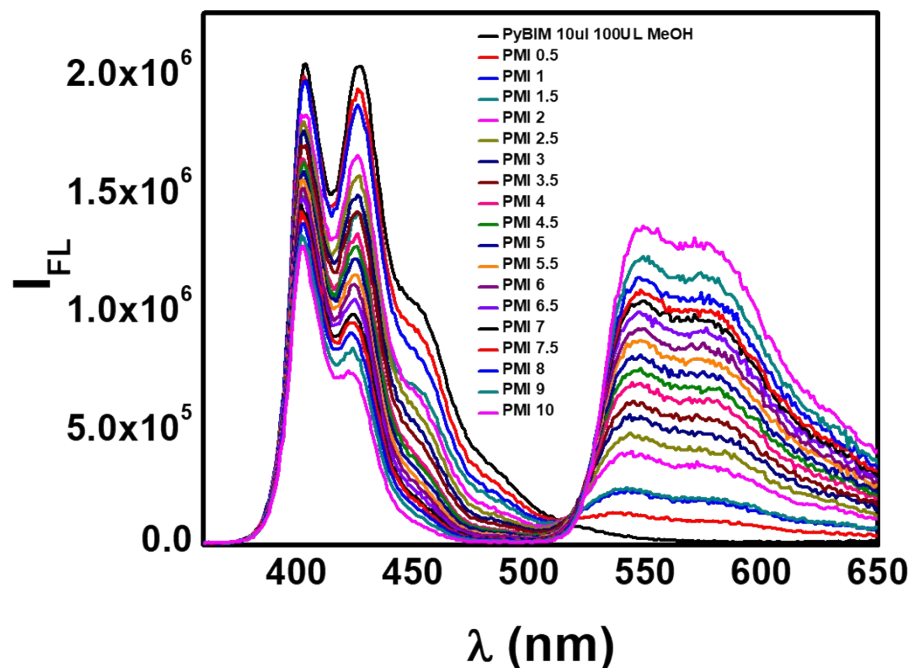

**Figure S17.** Fluorescence titration of PyBIM (10  $\mu$ M in 10% v/v MeOH in THF) with PMI at  $\lambda_{ex}$  = 355 nm.

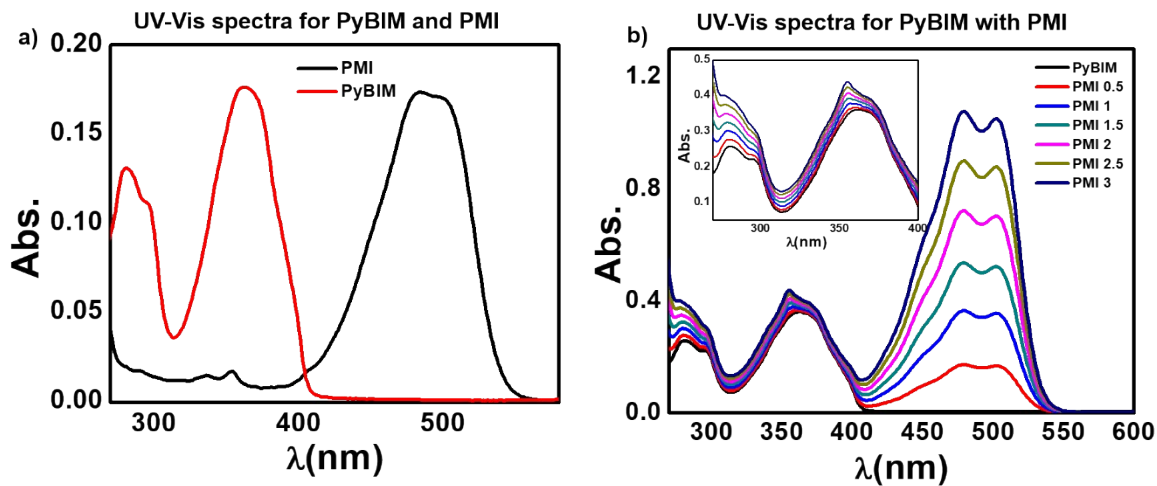

**Figure S18.** a) UV-Vis spectra of PyBIM and PMI recorded independently at 5  $\mu$ M each in THF; b) UV-Vis spectra after titration of PyBIM 10  $\mu$ M with PMI 5-30  $\mu$ M (Inset show the enlarged area between  $\lambda$  = 270-400 nm)

**Table S1.** Lifetime decay data (monitored at 405 nm) for PyBIM (10  $\mu\text{M}$  in THF) on addition of varied amounts of PMI.

| PMI ( $\mu\text{M}$ ) | 0    | 10   | 20   | 30   | 40   | 50   | 60   | 70   |
|-----------------------|------|------|------|------|------|------|------|------|
| $\tau$ (ns)           | 1.69 | 1.67 | 1.66 | 1.66 | 1.65 | 1.65 | 1.65 | 1.64 |
| $\chi^2$              | 1.01 | 1.09 | 1.14 | 1.01 | 1.04 | 1.07 | 1.04 | 1.05 |

**Table S2.** Lifetime decay data (monitored at 450 nm) for PyBIM<sup>+</sup> (10  $\mu\text{M}$  in THF) on addition varied amounts of PMI.

| PMI ( $\mu\text{M}$ ) | 0    | 10   | 20   | 30   | 40   | 50   | 60   | 70   |
|-----------------------|------|------|------|------|------|------|------|------|
| $\tau$ (ns)           | 2.44 | 2.42 | 2.40 | 2.39 | 2.38 | 2.34 | 2.34 | 2.34 |
| $\chi^2$              | 1.10 | 1.16 | 1.08 | 1.13 | 1.15 | 1.16 | 1.19 | 1.12 |

**Table S3.** Lifetime decay data (monitored at 500 nm) for PyBIM<sup>-</sup> (10  $\mu\text{M}$  in THF) on addition varied amounts of PMI.

| PMI ( $\mu\text{M}$ ) | 0    | 10   | 20   | 30   | 40   | 50   | 60   | 70   |
|-----------------------|------|------|------|------|------|------|------|------|
| $\tau$ (ns)           | 2.83 | 2.83 | 2.86 | 2.82 | 2.82 | 2.82 | 2.82 | 2.82 |
| $\chi^2$              | 1.18 | 1.12 | 1.20 | 1.20 | 0.98 | 1.05 | 1.04 | 0.99 |

**Table S4.** Percentage overlap of emission profile of PyBIM, PyBIM<sup>+</sup> and PyBIM<sup>-</sup> with the absorption profile of PMI (calculated using Origin-18 software).

| Species            | Areal Overlap (%) |
|--------------------|-------------------|
| PyBIM              | 33                |
| PyBIM <sup>+</sup> | 66                |
| PyBIM <sup>-</sup> | 76                |

**Table S5.** Variation of  $\Phi_{\text{WLE}}$  with PyBIM concentration. Equivalents of PMI required for WLE in each case is also provided.

| [PyBIM]<br>( $\mu\text{M}$ ) | Equ. Of<br>PMI used | CIE<br>coordinate | $\Phi_{\text{WLE}}$ (%) $\pm 3$ |
|------------------------------|---------------------|-------------------|---------------------------------|
| 2.5                          | 8                   | (0.32,0.33)       | 56                              |
| 5                            | 6.5                 | (0.32,0.33)       | 59                              |
| 10                           | 5.5                 | (0.33,0.33)       | 62.5                            |
| 15                           | 3                   | (0.32,0.32)       | 66                              |
| 20                           | 2.5                 | (0.33,0.33)       | 70                              |
| 25                           | 2                   | (0.33,0.34)       | 72                              |
| 30                           | 1.5                 | (0.34,0.35)       | 72.5                            |
| 40                           | 1                   | (0.33,0.34)       | 72                              |

Set up for structure optimized of PyBIM

Calculation method = B3LYP

Level of theory = 6-31 G(d)

Charge =0

Spin = Singlet

|     |         |         |         |   |
|-----|---------|---------|---------|---|
| N1  | 2.9410  | 1.0110  | -0.6730 | N |
| N2  | 2.4060  | -0.7400 | 0.5910  | N |
| C3  | 5.4500  | 0.6950  | -0.7510 | C |
| C4  | 6.4150  | -0.1300 | -0.2070 | C |
| C5  | 6.0780  | -1.2260 | 0.5970  | C |
| C6  | 4.7650  | -1.5170 | 0.8990  | C |
| C7  | 3.7760  | -0.6800 | 0.3940  | C |
| C8  | 4.1330  | 0.4040  | -0.4130 | C |
| C9  | 1.9330  | 0.3050  | -0.0560 | C |
| C10 | 0.5570  | 0.7960  | -0.0690 | C |
| C11 | 0.3160  | 2.1570  | 0.0000  | C |
| C12 | -0.8990 | 2.7640  | 0.1320  | C |
| C13 | -2.0200 | 1.9420  | 0.1710  | C |
| C14 | -3.3450 | 2.4640  | 0.3530  | C |
| C15 | -4.4200 | 1.6580  | 0.3410  | C |
| C16 | -4.3020 | 0.2540  | 0.1360  | C |
| C17 | -5.4050 | -0.5900 | 0.0680  | C |
| C18 | -5.2570 | -1.9500 | -0.1410 | C |
| C19 | -3.9890 | -2.5010 | -0.2750 | C |
| C20 | -2.8570 | -1.7010 | -0.1990 | C |
| C21 | -1.5380 | -2.2270 | -0.3460 | C |
| C22 | -0.4410 | -1.4340 | -0.3130 | C |
| C23 | -0.5610 | -0.0400 | -0.1070 | C |
| C24 | -1.8490 | 0.5400  | 0.0200  | C |
| C25 | -2.9980 | -0.3050 | -0.0110 | C |
| H26 | 5.6740  | 1.4200  | -1.3230 | H |
| H27 | 7.3310  | 0.0510  | -0.3830 | H |
| H28 | 6.7670  | -1.7810 | 0.9400  | H |
| H29 | 4.5420  | -2.2680 | 1.4360  | H |
| H30 | 1.1120  | 2.8070  | -0.0080 | H |
| H31 | -1.0040 | 3.7070  | 0.1900  | H |
| H32 | -3.4640 | 3.3980  | 0.4820  | H |
| H33 | -5.2810 | 2.0350  | 0.4720  | H |
| H34 | -6.2770 | -0.2280 | 0.1660  | H |
| H35 | -6.0240 | -2.5080 | -0.1930 | H |
| H36 | -3.8960 | -3.4350 | -0.4200 | H |
| H37 | -1.4270 | -3.1620 | -0.4720 | H |
| H38 | 0.4190  | -1.8240 | -0.4210 | H |
| H39 | 2.8520  | 1.8200  | -1.2230 | H |

Set up for structure optimized of PyBIM<sup>+</sup>

Calculation method = B3LYP

Level of theory = 6-31 G(d)

Charge = +1

Spin = Singlet

|     |         |         |         |   |
|-----|---------|---------|---------|---|
| N1  | 2.9600  | 1.1240  | -0.5790 | N |
| N2  | 2.4240  | -0.6610 | 0.5340  | N |
| C3  | 5.4800  | 0.7390  | -0.6710 | C |
| C4  | 6.4410  | -0.1760 | -0.2470 | C |
| C5  | 6.0950  | -1.3280 | 0.4850  | C |
| C6  | 4.7730  | -1.6150 | 0.8170  | C |
| C7  | 3.8120  | -0.7000 | 0.3910  | C |
| C8  | 4.1580  | 0.4530  | -0.3330 | C |
| C9  | 1.9130  | 0.4480  | -0.0490 | C |
| C10 | 0.5380  | 0.8960  | -0.0530 | C |
| C11 | 0.3160  | 2.2870  | 0.0650  | C |
| C12 | -0.9600 | 2.8040  | 0.1600  | C |
| C13 | -2.0830 | 1.9530  | 0.1470  | C |
| C14 | -3.4110 | 2.4680  | 0.2820  | C |
| C15 | -4.4930 | 1.6360  | 0.2680  | C |
| C16 | -4.3390 | 0.2200  | 0.1090  | C |
| C17 | -5.4420 | -0.6490 | 0.0860  | C |
| C18 | -5.2700 | -2.0230 | -0.0820 | C |
| C19 | -3.9930 | -2.5570 | -0.2330 | C |
| C20 | -2.8600 | -1.7240 | -0.2110 | C |
| C21 | -1.5370 | -2.2320 | -0.3930 | C |
| C22 | -0.4440 | -1.4130 | -0.3580 | C |
| C23 | -0.5690 | -0.0030 | -0.1220 | C |
| C24 | -1.8880 | 0.5420  | -0.0010 | C |
| C25 | -3.0250 | -0.3190 | -0.0330 | C |
| H26 | 5.7490  | 1.6270  | -1.2340 | H |
| H27 | 7.4830  | 0.0050  | -0.4870 | H |
| H28 | 6.8780  | -2.0110 | 0.7970  | H |
| H29 | 4.5090  | -2.5040 | 1.3810  | H |
| H30 | 1.1640  | 2.9610  | 0.1480  | H |
| H31 | -1.1040 | 3.8740  | 0.2750  | H |
| H32 | -3.5420 | 3.5400  | 0.3960  | H |
| H33 | -5.4960 | 2.0410  | 0.3740  | H |
| H34 | -6.4420 | -0.2380 | 0.1990  | H |
| H35 | -6.1350 | -2.6770 | -0.0990 | H |
| H36 | -3.8620 | -3.6270 | -0.3720 | H |
| H37 | -1.4090 | -3.2940 | -0.5840 | H |
| H38 | 0.5300  | -1.8420 | -0.5680 | H |
| H39 | 2.8500  | 1.9530  | -1.1490 | H |
| H40 | 1.8660  | -1.2950 | 1.0910  | H |

Set up for structure optimized of PyBIM-

Calculation method = B3LYP

Level of theory = 6-31 G(d)

Charge = -1

Spin = Singlet

|     |         |         |         |   |
|-----|---------|---------|---------|---|
| N1  | 3.0080  | 1.3320  | -0.0000 | N |
| N2  | 2.4240  | -0.9100 | 0.0000  | N |
| C3  | 5.4990  | 0.9650  | -0.0000 | C |
| C4  | 6.4670  | -0.0320 | 0.0000  | C |
| C5  | 6.1100  | -1.4040 | 0.0000  | C |
| C6  | 4.7790  | -1.8040 | 0.0000  | C |
| C7  | 3.7830  | -0.8100 | 0.0000  | C |
| C8  | 4.1430  | 0.5830  | -0.0000 | C |
| C9  | 2.0230  | 0.3900  | -0.0000 | C |
| C10 | 0.6150  | 0.8260  | -0.0000 | C |
| C11 | 0.3930  | 2.2220  | 0.0000  | C |
| C12 | -0.8740 | 2.7720  | 0.0000  | C |
| C13 | -2.0220 | 1.9590  | 0.0000  | C |
| C14 | -3.3450 | 2.5030  | 0.0000  | C |
| C15 | -4.4480 | 1.7010  | 0.0000  | C |
| C16 | -4.3190 | 0.2720  | 0.0000  | C |
| C17 | -5.4390 | -0.5780 | -0.0000 | C |
| C18 | -5.2830 | -1.9630 | -0.0000 | C |
| C19 | -4.0110 | -2.5300 | -0.0000 | C |
| C20 | -2.8600 | -1.7220 | -0.0000 | C |
| C21 | -1.5340 | -2.2650 | -0.0000 | C |
| C22 | -0.4280 | -1.4680 | -0.0000 | C |
| C23 | -0.5280 | -0.0320 | -0.0000 | C |
| C24 | -1.8450 | 0.5410  | 0.0000  | C |
| C25 | -3.0050 | -0.2990 | 0.0000  | C |
| H26 | 5.7740  | 2.0190  | -0.0010 | H |
| H27 | 7.5220  | 0.2400  | -0.0000 | H |
| H28 | 6.8990  | -2.1560 | 0.0010  | H |
| H29 | 4.5060  | -2.8580 | 0.0010  | H |
| H30 | 1.2750  | 2.8520  | -0.0000 | H |
| H31 | -0.9960 | 3.8540  | 0.0000  | H |
| H32 | -3.4520 | 3.5860  | 0.0000  | H |
| H33 | -5.4480 | 2.1310  | 0.0000  | H |
| H34 | -6.4340 | -0.1380 | 0.0000  | H |
| H35 | -6.1620 | -2.6050 | -0.0000 | H |
| H36 | -3.8930 | -3.6120 | -0.0000 | H |
| H37 | -1.4230 | -3.3480 | -0.0000 | H |
| H38 | 0.5750  | -1.8830 | -0.0000 | H |

1. P. Pallavi, B. Sk, P. Ahir, A. Patra, *Chem. Eur. J.* **2018**, *24*, 1151-1158.
2. Gaussian 09 (Revision A.02), M. J. Frisch, G. W. Trucks, H. B. Schlegel, G. E. Scuseria, M. A. Robb, J. R. Cheeseman, G. Scalmani, V. Barone, B. Mennucci, G. A. Petersson, H. Nakatsuji, M. Caricato, X. Li, H. P. Hratchian, A. F. Izmaylov, J. Bloino, G. Zheng, J. L. Sonnenberg, M. Hada, M. Ehara, K. Toyota, R. Fukuda, J. Hasegawa, M. Ishida, T. Nakajima, Y. Honda, O. Kitao, H. Nakai, T. Vreven, J. Montgomery, A. J., J. E. Peralta, F. Ogliaro, M. Bearpark, J. J. Heyd, E. Brothers, K. N. Kudin, V. N. Staroverov, T. Keith, R. Kobayashi, J. Normand, K. Raghavachari, A. Rendell, J. C. Burant, S. S. Iyengar, J. Tomasi, M. Cossi, N. Rega, J. M. Millam, M. Klene, J. E. Knox, J. B. Cross, V. Bakken, C. Adamo, J. Jaramillo, R. Gomperts, R. E. Stratmann, A. Azyev, A. Austin, R. Cammi, C. Pomelli, C. M. Ochterski, R. L. Martin, K. Morokuma, G. A. Zakrzewski, G. A. Oth, P. Salvador, D. Dannenberg, S. Dapprich, A. D. Daniels, J. B. Foresman, J. Cioslowski, D. J. Fox, Gaussian 09, Inc. Gaussian, CT. Wallingford, **2009**.
3. A. J. Hallett, N. White, W. Wu, X. Cui, P. N. Horton, S. J. Coles, J. Zhao, S. J. A. Pope, *Chem. Commun.*, **2012**, *48*, 10838-10840.
